# Supplementary material for: LPL, FNDC5 and PPARγ gene polymorphisms related to body composition parameters and lipid metabolic profile in adolescents from Southern Italy
Source: Springer Nature journal article supplement (doi:10.1186/s12967-022-03314-w), 2022-03-03
Supplement: MOESM1 [file 20189450]

| <b>Gene</b>    | <b>Chromosomal location</b> | <b>Biological process</b>                                                                             | <b>References</b> |
|----------------|-----------------------------|-------------------------------------------------------------------------------------------------------|-------------------|
| <i>FNDC5</i>   | 1p35.1                      | Homeostatic metabolism                                                                                | [16]              |
| <i>IL-6</i>    | 7p15.3                      | Inflammation and the maturation of B cells                                                            | [17]              |
| <i>CRP</i>     | 1q23.2                      | Host defense                                                                                          | [18]              |
| <i>HFE</i>     | 6p22.2                      | Intestinal absorption of iron                                                                         | [19]              |
| <i>PPARG</i>   | 3p25.2                      | Nuclear receptor involved in physical performance                                                     | [20]              |
| <i>IL-10</i>   | 1q32.1                      | Immune regulatory cytokine that effects in inflammation                                               | [21]              |
| <i>TNF</i>     | 6p21.33                     | Cell proliferation, differentiation, apoptosis, lipid metabolism and coagulation                      | [22]              |
| <i>IL1B</i>    | 2q14.1                      | Prostaglandin synthesis, fibroblast proliferation, collagen production and differentiation of T-cells | [23]              |
| <i>TGFB1</i>   | 19q13.2                     | Cell proliferation, differentiation and growth, expression and activation of other growth factors     | [24]              |
| <i>LPL</i>     | 8p21.3                      | Triglyceride metabolism, lipid clearance and cholesterol metabolism                                   | [25]              |
| <i>HMGCR</i>   | 5q13.3                      | Cholesterol biosynthesis, cholesterol metabolism, lipid clearance                                     | [26]              |
| <i>CETP</i>    | 16q13                       | Transfer of neutral lipids, including cholesteryl ester and triglyceride, among lipoprotein particles | [27]              |
| <i>LIPC</i>    | 15q21.3                     | Hydrolysis of triglycerides and phospholipids present in circulating plasma lipoproteins              | [28]              |
| <i>FADS1/2</i> | 11q12.2                     | Essential fatty acid metabolism                                                                       | [29]              |

**Supplemental Table S1.** Diet, lifestyle, and physical performance/sports - related genes examined in this study.
