# Supplementary material for: LPL, FNDC5 and PPARγ gene polymorphisms related to body composition parameters and lipid metabolic profile in adolescents from Southern Italy
Source: Springer Nature journal article supplement (doi:10.1186/s12967-022-03314-w), 2022-03-03
Supplement: MOESM2 [file 20189450]

| Gene        | Variation             | Amminoacid change  | Gene region     | RefSNP ID          | Chr. Position   | Location        | Alleles    | Type       | Variant Effect      | MAF              |
|-------------|-----------------------|--------------------|-----------------|--------------------|-----------------|-----------------|------------|------------|---------------------|------------------|
| LPL         | c.*1142C>T            |                    | exon 10         | rs1059507          | 19823963        | 3'UTR           | C/T        | SNV        | unknown             | 0.126            |
|             | c.*1742T>C            |                    |                 | rs1059611          | 19824563        | 3'UTR           | T/C        | SNV        | unknown             | 0.21             |
|             | c.*1806_*1807insTT    |                    | exon 10         | rs10645926         | 19824626        | 3'UTR           | / TT       | INDEL      | unknown             | 0.1013           |
|             | c.405G>A              | p.Val135=          | exon 3          | rs1121923          | 19809435        | exonic          | G/A        | SNV        | synonymous          | 0.049            |
|             | c.1428-11C>T          |                    | intron 9        | rs11570891         | 19822810        | intronic        | C/T        | SNV        | unknown             | 0.107            |
|             | c.*796A>G             |                    | exon 10         | rs11570892         | 19823617        | 3'UTR           | A/G        | SNV        | unknown             | 0.168            |
|             | c.*1671T>C            |                    | exon 10         | rs13702            | 19824492        | 3'UTR           | T/A        | SNV        | unknown             | 0.49             |
|             | c.*1846C>T            |                    | exon 10         | rs1446407392       | 19824667        | 3'UTR           | C/T        | SNV        | unknown             | 0.33             |
|             | c.430-47A>C           |                    | intron 3        | rs1554517533       | 19953263        | intronic        | A/C        | SNV        | unknown             | 0.0000895        |
|             | <b>c.*853C&gt;G</b>   |                    | <b>exon 10</b>  | <b>rs1803924</b>   | <b>19823674</b> | <b>3'UTR</b>    | <b>C/T</b> | <b>SNV</b> | <b>unknown</b>      | <b>0.101</b>     |
|             | c.541+74T>C           |                    | intron 4        | rs249              | 19953495        | intronic        | T/C        | SNV        | unknown             | 0.0791           |
|             | c.775+33C>G           |                    | intron 5        | rs254              | 19811897        | intronic        | C/G        | SNV        | unknown             | 0.146            |
|             | c.775+37T>C           |                    | intron 5        | rs255              | 19811901        | intronic        | T/C        | SNV        | unknown             | 0.146            |
|             | c.775+103C>T          |                    |                 | rs256              | 19811967        | intronic        | C/T        | SNV        | unknown             | 0.138            |
|             | c.953A>G              | p.Asn318Ser        | exon 6          | rs268              | 19956018        | exonic          | A/G        | SNV        | missense            | 0.039            |
|             | c.1139+43T>C          |                    | intron 7        | rs301              | 19816934        | intronic        | T/C        | SNV        | unknown             | 0.241            |
|             | c.1164C>A             | p.Thr388=          | exon 8          | rs316              | 19960925        | exonic          | C/A        | SNV        | synonymous          | 0.039            |
|             | c.*1250A>G            |                    | exon 10         | rs3200218          | 19824071        | 3'UTR           | A/G        | SNV        | unknown             | 0.252            |
|             | c.69_70insC           | p.Gly24ArgfsTer17  | exon 1          |                    | 19797020        | 3'UTR           | / C        | INDEL      | frameshiftInsertion | <b>0.23</b>      |
|             | c.*827A>T             |                    |                 | rs3208305          | 19823648        | 3'UTR           | A/T        | SNV        | unknown             | 0.281            |
|             | c.1421C>G             | p.Ser474Ter        | exon 9          | rs328              | 19819724        | exonic          | C/G        | SNV        | nonsense            | 0.101            |
|             | c.1427+356A>G         |                    | intron 9        | rs329              | 19962575        | intronic        | A/G        | SNV        | unknown             | 0.12             |
|             | c.430-34C>A           |                    | intron 3        | rs343              | 19953276        | intronic        | C/A        | SNV        | unknown             | 0.20             |
|             | c.*1224C>A            |                    |                 | rs3735964          | 19824045        | 3'UTR           | C/A        | SNV        | unknown             | 0.101            |
|             | <b>c.*1848C&gt;A</b>  |                    | <b>exon 10</b>  | <b>rs3866471</b>   | <b>19824669</b> | <b>3'UTR</b>    | <b>C/A</b> | <b>SNV</b> | <b>unknown</b>      | <b>0.162</b>     |
|             | c.*9G>A               |                    |                 | rs4922115          | 19822830        | 3'UTR           | G/A        | SNV        | unknown             | 0.12             |
|             | c.*1895T>TA           |                    |                 |                    | 19824716        | 3'UTR           | / A        | INDEL      | unknown             | <0.01            |
|             | c.249+22_249+23insG   |                    |                 |                    | 19805873        | intronic        | / G        | INDEL      | unknown             | <0.01            |
|             | c.*371T>C             |                    | exon 10         | rs3289             | 19823192        | 3'UTR           | T/C        | SNV        | unknown             | 0.039            |
|             | <b>c.590G&gt;T</b>    | <b>p.Arg197Leu</b> | <b>exon 5</b>   | <b>rs372668179</b> | <b>19954168</b> | <b>exonic</b>   | <b>G/A</b> | <b>SNV</b> | <b>missense</b>     | <b>0.001</b>     |
|             | <b>c.*1387T&gt;C</b>  |                    | <b>exon 10</b>  | <b>rs1803923</b>   | <b>19966697</b> | <b>3'UTR</b>    | <b>T/C</b> | <b>SNV</b> | <b>unknown</b>      | <b>0.003</b>     |
|             | <b>c.775+80A&gt;G</b> |                    | <b>intron 5</b> | <b>rs80143795</b>  | <b>19954433</b> | <b>intronic</b> | <b>A/G</b> | <b>SNV</b> | <b>unknown</b>      | <b>0.0000648</b> |
| c.541+97G>A |                       | intron 4           | rs1160372282    | 19953518           | intronic        | G/A             | SNV        | unknown    | <0.01               |                  |
| c.-283G>T   |                       |                    | rs80351041      | 19939158           | intronic        | G/T             | SNV        | unknown    | 0.03                |                  |
| c.430-58C>A |                       | intron 3           | rs1043637503    | 19953252           | intronic        | C/A             | SNV        | unknown    | <0.01               |                  |

|       |                             |                           |                 |                     |                   |                          |             |              |                            |                 |
|-------|-----------------------------|---------------------------|-----------------|---------------------|-------------------|--------------------------|-------------|--------------|----------------------------|-----------------|
|       | c.776-7del                  |                           | intron 5        | rs763904323         | 19813339          | intronic                 |             | INDEL        | unknown                    | <0.01           |
|       | <b>c.*717C&gt;T</b>         |                           | <b>exon 10</b>  | <b>rs1427611839</b> | <b>19966027</b>   | <b>3'UTR</b>             | <b>C/T</b>  | <b>SNV</b>   | <b>unknown</b>             | <b>&lt;0.01</b> |
|       | <b>c.1322+34A&gt;T</b>      |                           | <b>intron 8</b> | <b>rs1563581796</b> | <b>19961117</b>   | <b>intronic</b>          | <b>A/T</b>  | <b>SNV</b>   | <b>unknown</b>             | <b>&lt;0.01</b> |
|       | c.1140-13C>T                |                           | intron 7        | rs756414875         | 19960888          | intronic                 | C/T         | SNV          | unknown                    | 0.000008798     |
|       | c.*172C>A                   |                           | exon 10         | rs1200136169        | 19965482          | 3'UTR                    | C/A         | SNV          | unknown                    | 0.001           |
|       | c.*828A>C                   |                           | exon 10         | rs1243571209        | 19966138          | 3'UTR                    | A/C         | SNV          | unknown                    | <0.01           |
|       | c.1043A>C                   | p.His348Pro               | exon 7          | rs1563579671        | 19959284          | exonic                   | A/C         | SNV          | missense                   | <0.01           |
|       | c.1427+78A>C                |                           | intron 9        | rs1590148879        | 19962297          | intronic                 | A/C         | SNV          | unknown                    | <0.01           |
|       | c.*820A>G                   |                           | exon 10         |                     | 19823641          | 3'UTR                    | A/G         | SNV          | unknown                    | <0.01           |
|       | c.-281T>G                   |                           | exon 1          | rs1800590           | 19939160          | upstream                 | T/G         | SNV          | unknown                    | 0.47            |
|       | c.106G>A                    | p.Asp36Asn                |                 | rs1801177           | 19948197          | exonic                   | G/A         | SNV          | missense                   | 0.013           |
|       | c.249+82_249+83insC         |                           | intron 2        | chr8:19805933       | 19805934          | intronic                 | / C         | INDEL        | unknown                    | <0.01           |
|       | c.*174_*176delCTAinsACT     |                           | exon 10         | chr8:19822995       | 19822995          | 3'UTR                    |             | Substitution | unknown                    | <0.01           |
|       | c.*1127G>T                  |                           | exon 10         | 19823948            | 19823948          | 3'UTR                    | G/T         | SNV          | unknown                    | <0.01           |
|       | c.*1916_*1917insA           |                           | exon 10         | chr8:19824737       | 19824738          | 3'UTR                    | / A         | INDEL        | unknown                    | <0.01           |
|       | <b>c.249+7G&gt;C</b>        |                           | <b>intron 2</b> | <b>rs1161286800</b> | <b>19948347</b>   | <b>intronic</b>          | <b>G/C</b>  | <b>SNV</b>   | <b>unknown</b>             | <b>0.0001</b>   |
|       | <b>c.541+97_541+98insTG</b> |                           | <b>intron 4</b> | <b>rs1160372282</b> | <b>19811029</b>   | <b>intronic</b>          |             | <b>INDEL</b> | <b>unknown</b>             | <b>&lt;0.01</b> |
|       | c.-113A>C                   |                           | exon 1          | rs771569574         | 19939328          | 5'utr                    | A/C         | SNV          | unknown                    | <0.01           |
|       | c.*547T>C                   |                           | exon 10         | rs995558109         | 19965857          | 3'UTR                    | T/C         | SNV          | unknown                    | <0.01           |
|       | c.430-34C>A                 |                           | intron 3        | rs343               | 19810787          | intronic                 | C/A         | SNV          | unknown                    | 0.20            |
|       | <b>c.353A&gt;G</b>          | <b>p.Gln118HisfsTer30</b> | <b>exon 3</b>   | <b>rs1176046872</b> | <b>19809383</b>   | <b>exonic</b>            | <b>A/C</b>  | <b>SNV</b>   | <b>frameshiftInsertion</b> | <b>0.001</b>    |
|       | c.*1742T>C                  |                           | exon 10         | rs1059611           | 19824563          | 3'UTR                    | T/C         | SNV          | unknown                    | 0.21            |
|       | <b>c.*795C&gt;T</b>         |                           | <b>exon 10</b>  | <b>rs1314699988</b> | <b>19823616</b>   | <b>3'UTR</b>             | <b>C/T</b>  | <b>INDEL</b> | <b>unknown</b>             | <b>&lt;0.01</b> |
|       | c.*1805C>CTT                |                           | exon 10         | rs10645926          | 19824626          | 3'UTR                    | / TT        | INDEL        | unknown                    | 0.286           |
|       | c.435G>A                    | p.Glu145=                 | exon 4          | rs248               | 19953315          | exonic                   | G/A         | SNV          | synonymous                 | 0.013           |
|       | c.775+80A>G                 |                           | intron 5        | rs80143795          | 19954433          | intronic                 | A/G         | SNV          | unknown                    | 0.13            |
| FNDC5 | c.275-34T>C                 |                           | intron 4        | rs1284368           | 33330432          | intronic                 | A/G         | SNV          | unknown                    | 0.016           |
|       |                             |                           |                 | rs1298190           | 33340038          | upstream                 | G/A         | SNV          | unknown                    | <0.01           |
|       | <b>c.164A&gt;C</b>          |                           | <b>intron 5</b> | <b>rs1338123015</b> | <b>32864446</b>   | <b>intronic</b>          | <b>T/G</b>  | <b>SNV</b>   | <b>unknown</b>             | <b>&lt;0.01</b> |
|       | c.-127-450_-127-445del      |                           | intron 1        | rs1361479925        | 33335040          | intronic                 |             | INDEL        | unknown                    | 0.07            |
|       | c.1800_1801dup              |                           | exon 5          | rs138570533         | 33328409          | 3'UTR                    | G/GGA       | INDEL        | unknown                    | 0.06            |
|       | c.241C>T                    | p.Leu81=                  | exon 4          | rs138727728         | 32867786          | exonic                   | G/A         | SNV          | synonymous                 | 0.01            |
|       |                             |                           |                 | rs1448537936        | 32872520-32872526 | regulatory region intron | TCTTTCT/TCT | INDEL        | unknown                    | <0.01           |
|       | c.-128+1039C>G              |                           | intron 1        | rs1570569           | 33336956          | intronic                 | G/C         | SNV          | unknown                    | 0.14            |
|       | c.2046C>T                   |                           |                 | rs3480              | 33328165          | 3'UTR                    | G/A         | SNV          | unknown                    | 0.416           |
|       |                             |                           |                 | <b>rs57219418</b>   | <b>32874343</b>   | <b>intergenic</b>        | <b>C/T</b>  | <b>SNV</b>   | <b>unknown</b>             | <b>0.29</b>     |

|               |                         |                          |                 |                     |                   |                          |                 |              |                              |                 |
|---------------|-------------------------|--------------------------|-----------------|---------------------|-------------------|--------------------------|-----------------|--------------|------------------------------|-----------------|
|               | c.274+250C>T            |                          | intron 4        | rs726344            | 33333104          | intronic                 | G/A             | SNV          | unknown                      | 0.147           |
|               | c.-127-446G>C           |                          | intron 1        | rs142773183         | 32869439          | intronic                 | C/G             | SNV          | unknown                      | 0.04            |
|               | c.-4135A>G              |                          |                 |                     | 33338109          | upstream                 | T/C             | SNV          | unknown                      | <0.01           |
|               | c.-4081T>A              |                          |                 |                     | 33338055          | 5'UTR                    | A/T             | SNV          | unknown                      | <0.01           |
|               | <b>c.677G&gt;A</b>      |                          |                 | <b>rs1043065315</b> | <b>33329534</b>   | <b>3'UTR</b>             | <b>C/T</b>      | <b>SNV</b>   | <b>unknown</b>               | <b>&lt;0.01</b> |
|               | <b>c.1229C&gt;T</b>     |                          |                 | <b>rs41265869</b>   | <b>32863381</b>   | <b>3'UTR</b>             | <b>G/A</b>      | <b>SNV</b>   | <b>unknown</b>               | <b>0.05</b>     |
|               | <b>c.274+326C&gt;A</b>  |                          | <b>intron 4</b> | <b>rs974722844</b>  | <b>32867427</b>   | <b>intronic</b>          | <b>G/T</b>      | <b>SNV</b>   | <b>unknown</b>               | <b>&lt;0.01</b> |
|               |                         |                          |                 | rs910923450         | 32872490-32872494 | regulatory region intron | TC/             | INDEL        | unknown                      | <0.01           |
|               | c.274+85A>G             |                          | intron 4        | rs1187456844        | 32867668          | intronic                 | T/C             | SNV          | unknown                      | <0.01           |
|               | c.1055_1057del          |                          |                 | rs1243458159        | 33329156          | 3'UTR                    | TTA/            | INDEL        | unknown                      | <0.01           |
|               | <b>c.393delG</b>        | <b>p.Leu132PhefsTer6</b> | <b>exon 5</b>   | <b>rs1164445439</b> | <b>32864679</b>   | <b>exonic</b>            | <b>C/T</b>      | <b>INDEL</b> | <b>frameshiftDeletion</b>    | <b>&lt;0.01</b> |
|               | <b>c.1829G&gt;A</b>     |                          |                 | <b>rs1429301233</b> | <b>32862781</b>   | <b>3'UTR</b>             | <b>C/T</b>      | <b>SNV</b>   | <b>splice region variant</b> | <b>&lt;0.01</b> |
|               | c.346dup                | p.Thr116AsnfsTer90       |                 | rs1245625486        | 32864726-32864731 | intronic                 | / T             | INDEL        | frameshift/intron            | <0.01           |
|               | c.157A>G                |                          |                 | rs1403315264        | 32864453          | 3'UTR                    | T/C             | SNV          | unknown                      | <0.01           |
|               | c.1973_1974insC         |                          |                 |                     | 33328238          | 3'UTR                    | / C             | INDEL        | unknown                      | <0.01           |
|               | c.1389delA              |                          |                 |                     | 33328822          | 3'UTR                    | A /             | INDEL        | unknown                      | <0.01           |
|               | c.274+325T>A            |                          | intron 4        | rs1025936314        | 32867428          | intronic                 | A/T             | SNV          | unknown                      | <0.01           |
|               | c.*643_*644insA         |                          | exon 5          |                     | 33329568          | 3'UTR                    | / T             | INDEL        | unknown                      | <0.01           |
|               | <b>c.*825T&gt;C</b>     |                          |                 | <b>rs191148874</b>  | <b>32863785</b>   | <b>3'UTR</b>             | <b>A/G</b>      | <b>SNV</b>   | <b>unknown</b>               | <b>0.02</b>     |
|               | <b>c.379C&gt;A</b>      | <b>p.His127Asn</b>       | <b>exon 5</b>   | <b>rs759315666</b>  | <b>32864693</b>   | <b>exonic</b>            | <b>G/T</b>      | <b>SNV</b>   |                              | <b>&lt;0.01</b> |
|               | c.*1078dup              |                          |                 |                     | 33329133          | 3'UTR                    | / T             | INDEL        | unknown                      | <0.01           |
|               | c.-208_-202del          |                          |                 | rs1029941501        | 32872468          | 5'utr                    | TCTCTTT (7bp) / | INDEL        | unknown                      | <0.01           |
|               |                         |                          |                 |                     | 33338137          | upstream                 | / C             | INDEL        | unknown                      | <0.01           |
|               | c.*1348G>A              |                          |                 | rs188449869         | 32863262          | 3'UTR                    | C/T             | SNV          | unknown                      | 0.01            |
|               | <b>c.*1059A&gt;T</b>    |                          |                 | <b>rs559443224</b>  | <b>33329152</b>   | <b>3'UTR</b>             | <b>T/A</b>      | <b>SNV</b>   | <b>unknown</b>               | <b>0.006</b>    |
|               | c.275-34T>C             |                          |                 | rs1284368           | 33330432          | intronic                 | A/G             | SNV          | unknown                      | 0.016           |
|               | c.274+23T>C             |                          | intron 4        | rs1258376954        | 33333330          | intronic                 | A/G             | INDEL        | unknown                      | <0,01           |
|               | <b>c.-127-446G&gt;A</b> |                          |                 | <b>rs142773183</b>  | <b>33335040</b>   | <b>intronic</b>          | <b>C/T</b>      | <b>SNV</b>   | <b>unknown</b>               | <b>0.07</b>     |
| PPAR $\gamma$ | c.34C>G                 | p.Pro12Ala               | exon 1          | rs1801282           | 12393125          | exonic                   | C/G             | SNV          | missense                     | 0.124           |
|               | c.1431C>T               | p.His477=                | exon 7          | rs3856806           | 12475557          | 3'UTR                    | C/T             | SNV          | synonymous                   | 0.126           |
|               | c.531_532insA           | p.Leu178ThrfsTer2        | exon 4          | rs1469268585        | 12434163          | exonic                   | T/TA            | INDEL        | frameshiftInsertion          | 0.00000797      |
|               | c.481-13dupT            |                          |                 |                     | 12434094          | intronic                 | C/CT            | INDEL        | unknown                      | <0.01           |
|               | c.868G>T                | p.Gly290Trp              | exon 5          |                     | 12447629          | exonic                   | G/T             | SNV          | unknown                      | <0.01           |
|               | c.39del                 | p.Val14Ter               | exon 5          | rs587776687         | 12475349          | intronic                 | A/AT            | INDEL        | nonsense                     | <0.01           |

|  |                    |                    |               |                     |                   |               |            |            |                       |                 |
|--|--------------------|--------------------|---------------|---------------------|-------------------|---------------|------------|------------|-----------------------|-----------------|
|  | c.-79dupT          |                    |               |                     | 12393009          | 5'_utr        | / T        | INDEL      | unknown               | <0.01           |
|  | c.850dup           | p.Glu284GlyfsTer68 | exon 5        | rs769209078         | 12475349          | intronic      | / G        | INDEL      | frameshift            | <0.01           |
|  | <b>c.550A&gt;G</b> | <b>p.Lys156Glu</b> | <b>exon 4</b> | <b>rs1575106051</b> | <b>12392683</b>   | <b>exonic</b> | <b>A/G</b> | <b>SNV</b> | <b>synonymous</b>     | <b>&lt;0.01</b> |
|  | c.310+16dup        |                    | intron 2      |                     | 12421443          | intronic      | / T        | INDEL      | unknown               | <0.01           |
|  | c.18_19insC        | p.Asp7ArgfsTer5    | exon 1        |                     | 12393109          | exonic        | / C        | INDEL      | frameshiftInsertion   | <0.01           |
|  | c.874_875del       | p.Leu292ValfsTer59 | exon 5        | rs1287260681        | 12406133-12406137 | non coding    | TT/        | INDEL      | non coding transcript | < 0.01          |

**Additional file Table S2.** List of variants identified in this study.
